# Supplementary material for: Does forced voting result in political polarization?
Source: Springer Nature journal article supplement (doi:10.1007/s11127-016-0318-7), 2016-01-01
Supplement: MOESM1 [file 7500764]

# Figures A1

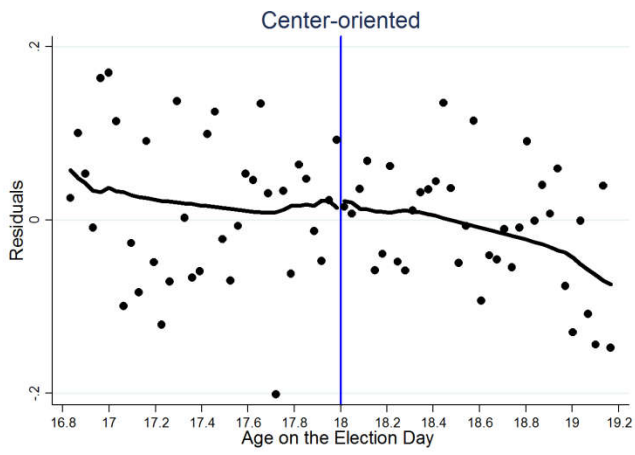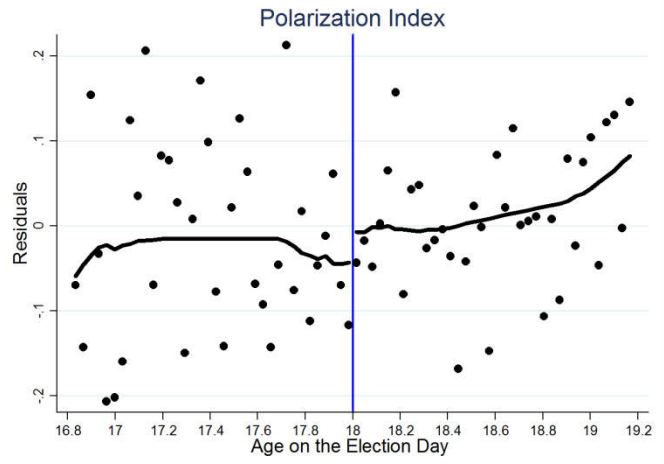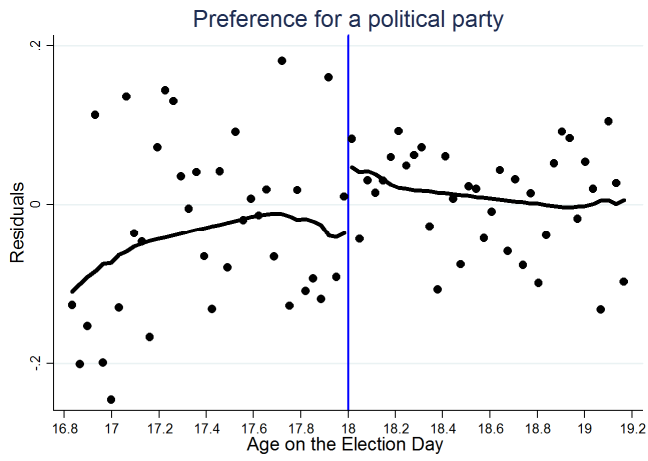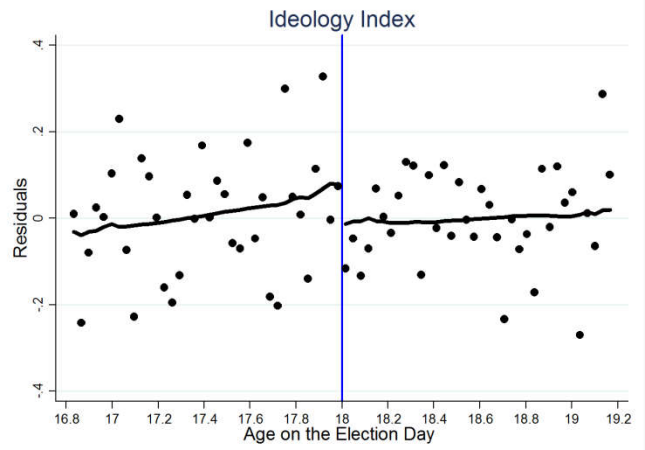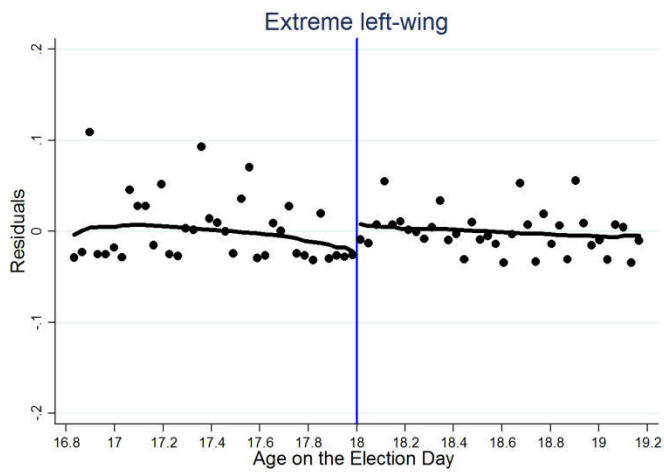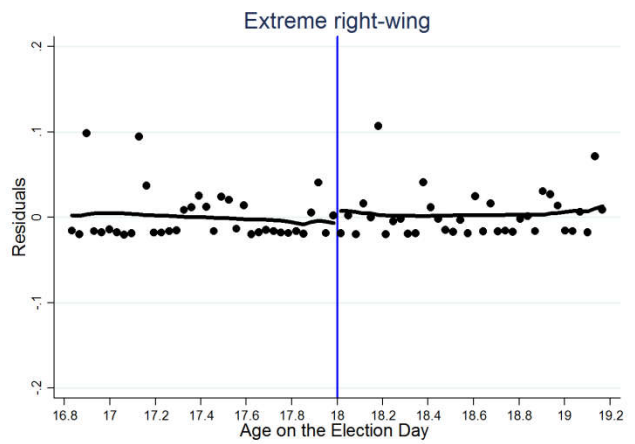

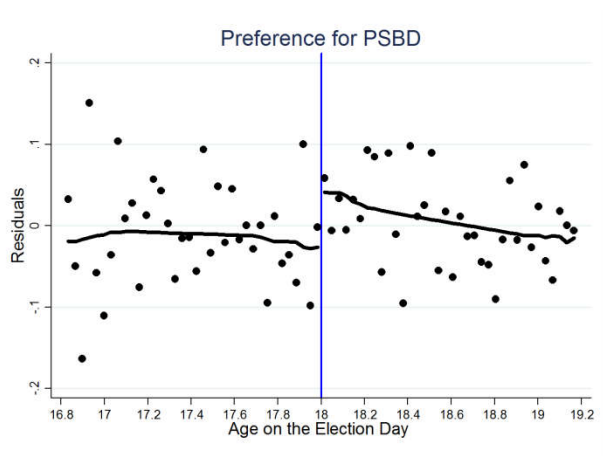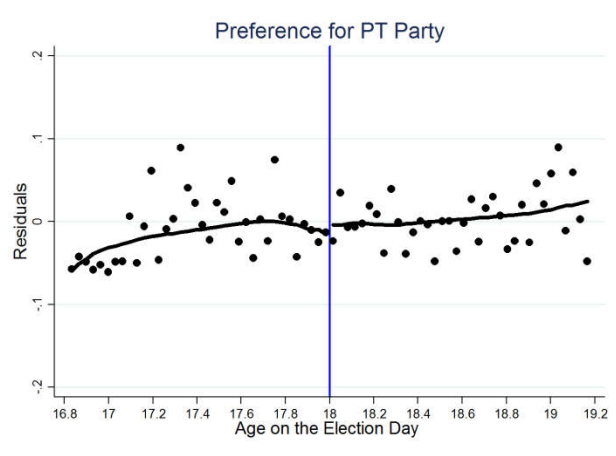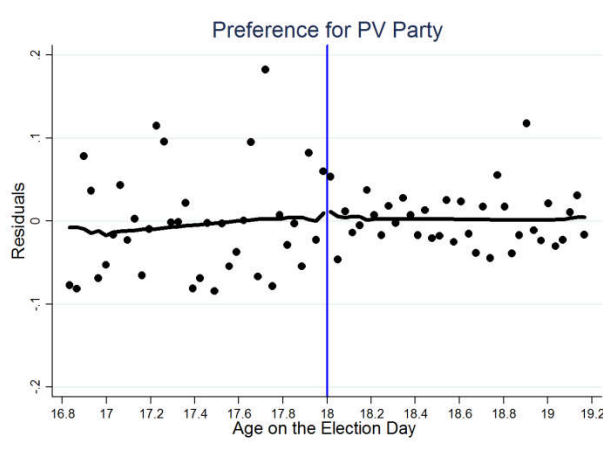

Note: Circles indicate average residual outcome values in a 12-day interval. Lines are predicted from local linear regressions using a rectangular kernel and a bandwidth of nine months. Residuals are obtained by regressing outcome on school-fixed effect, an indicator for whether the participant voted before and demographic characteristics (mother's education, gender and race indicators).
